# Supplementary material
Source: PubMed Central journal article supplement (PMC9960181)
Supplement: NIHMS1862408-supplement-Figs__S1_to_S13.pdf [file NIHMS1862408-supplement-Figs__S1_to_S13.pdf]

Supplementary Materials for  
***Salmonella* Typhi Vi capsule prime-boost vaccination induces convergent and functional antibody responses**

Lindsay C. Dahora *et al.*

Corresponding author: Lindsay C. Dahora, lcd26@duke.edu; Georgia D. Tomaras, gdt@duke.edu

*Sci. Immunol.* **6**, eabj1181 (2021)  
DOI: 10.1126/sciimmunol.abj1181

**The PDF file includes:**

Figs. S1 to S13

**Other Supplementary Material for this manuscript includes the following:**

Data S1 to S3

## Supplementary Materials

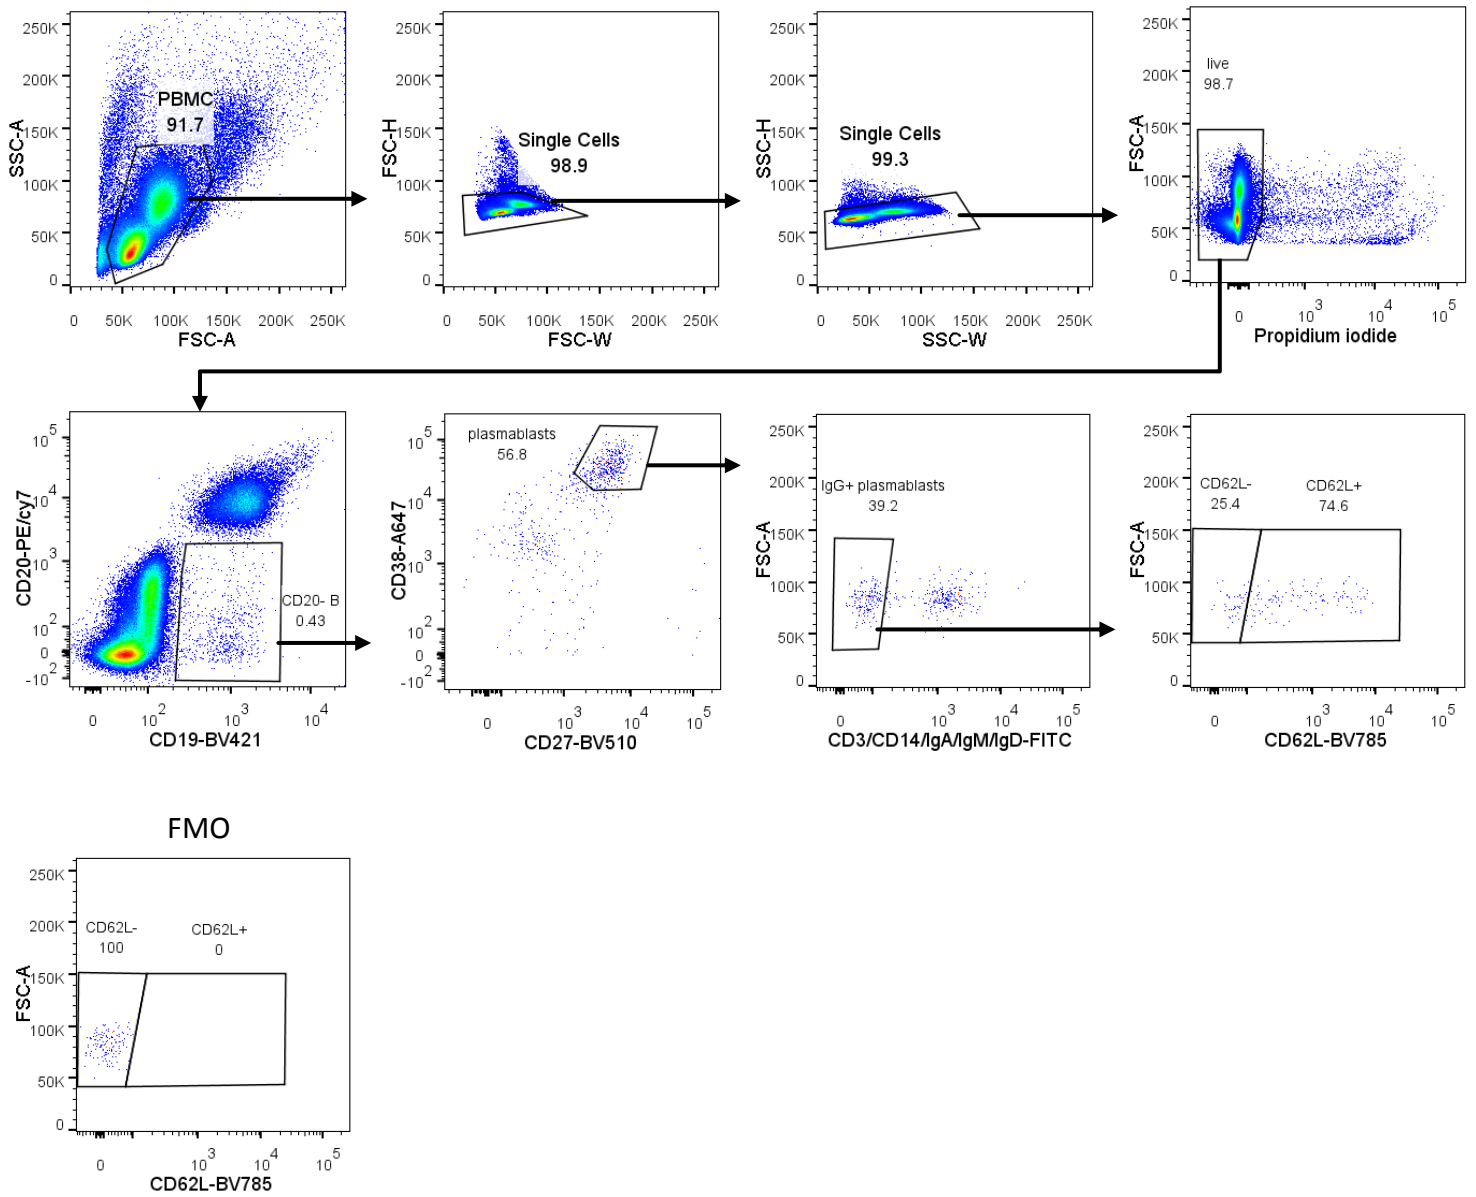

**Fig. S1 – Example gating strategy for sorting of IgG<sup>+</sup> plasmablasts from human vaccinee PBMCs**

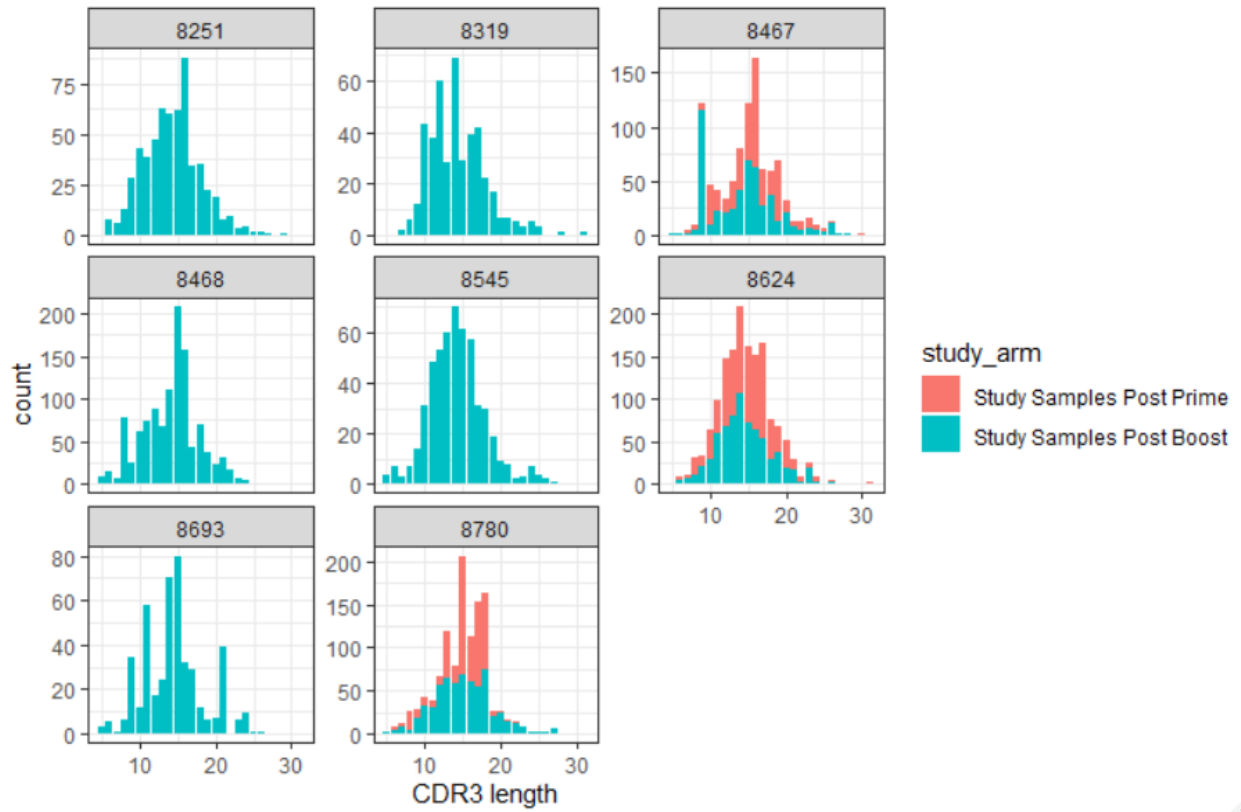

**Fig. S2 – Heavy chain CDR3 length after Vi-TT primary immunization or Vi-PS-boost immunization**

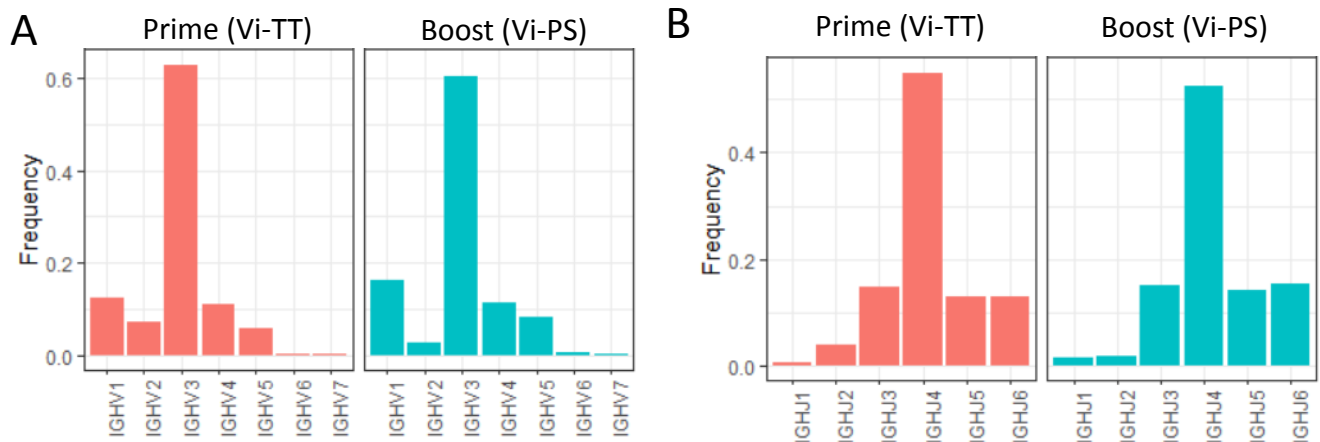

**Fig. S3 – Sequence characteristics of BCRs from IgG-positive plasmablasts after Vi-TT primary or Vi-PS boost immunization**

A) Ig heavy chain variable region usage, showing samples that were paired between immunization (n=3). B) Ig heavy chain junction region usage, showing samples that were paired between immunizations (n=3).

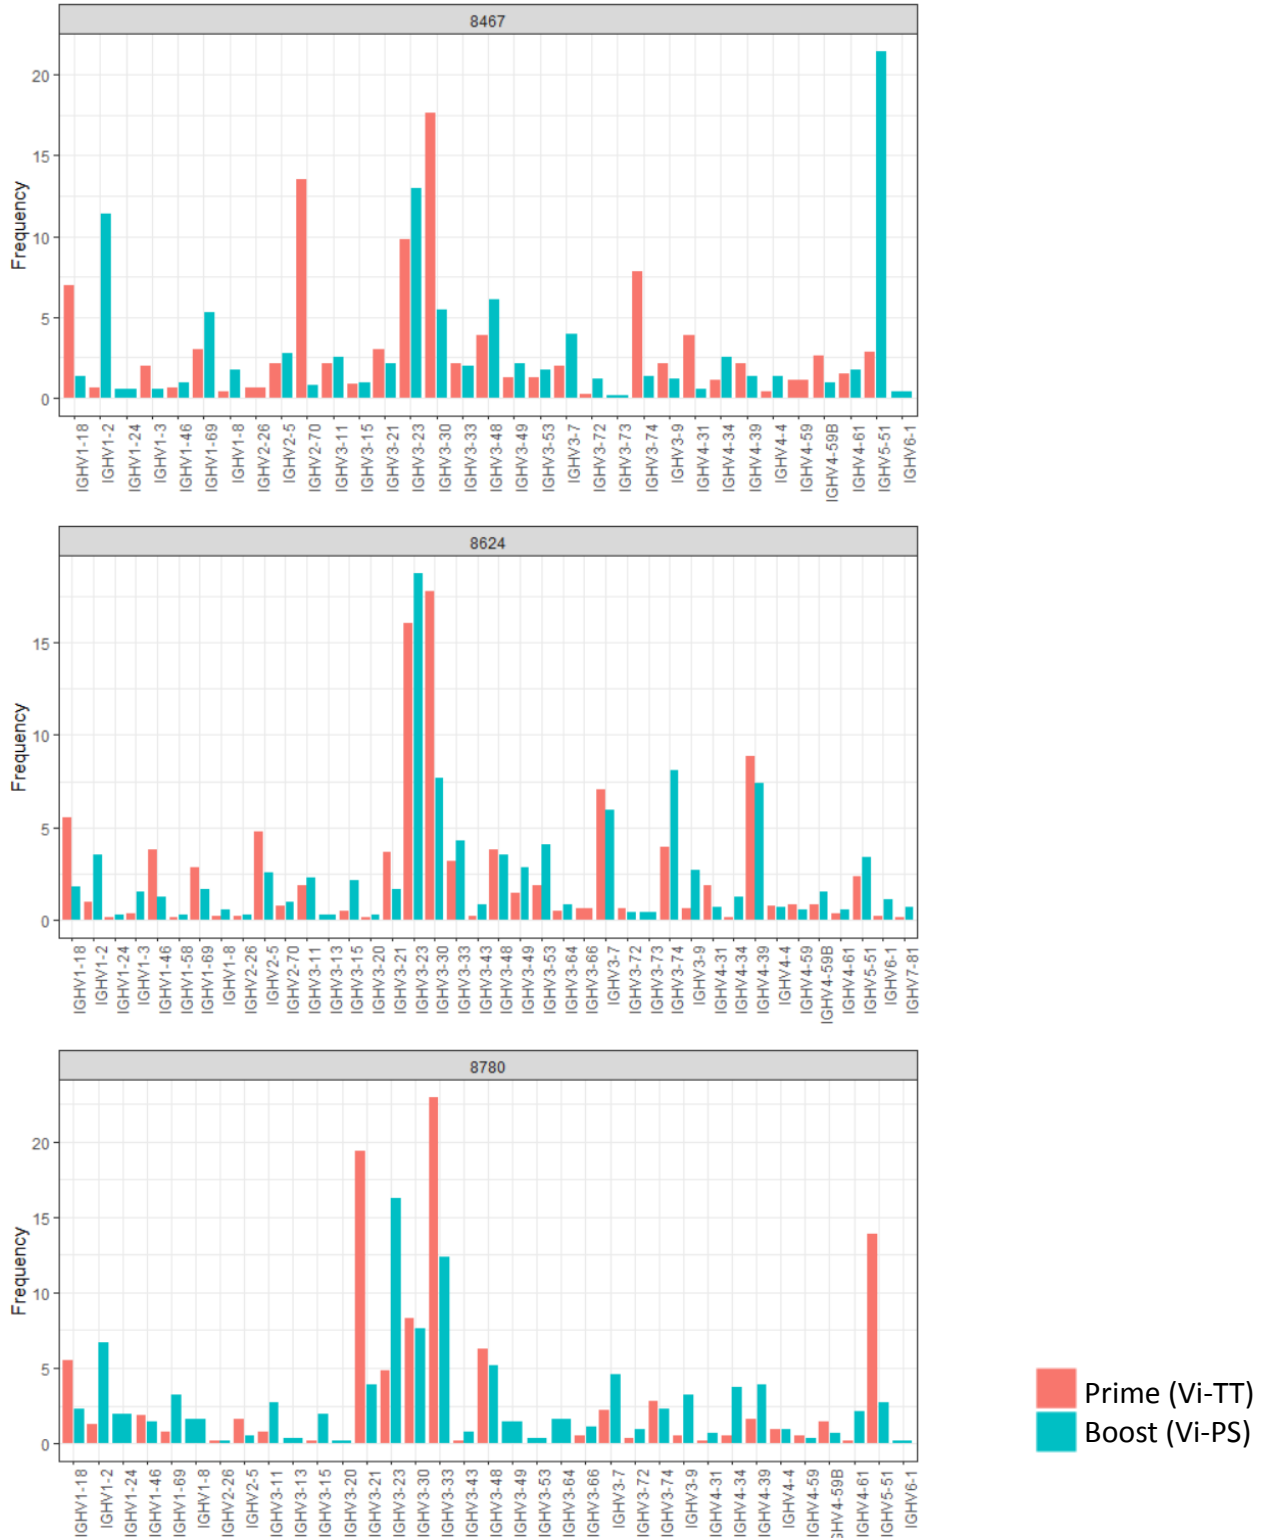

**Fig. S4 – Sequence characteristics of BCRs from IgG-positive plasmablasts after Vi-TT primary or Vi-PS boost immunization, focusing on Ig heavy chain variable regions**  
 Ig heavy chain variable region usage, showing the usage after the Vi-TT prime and Vi-PS boost immunizations for the 3 individuals for who data after both vaccines was available.

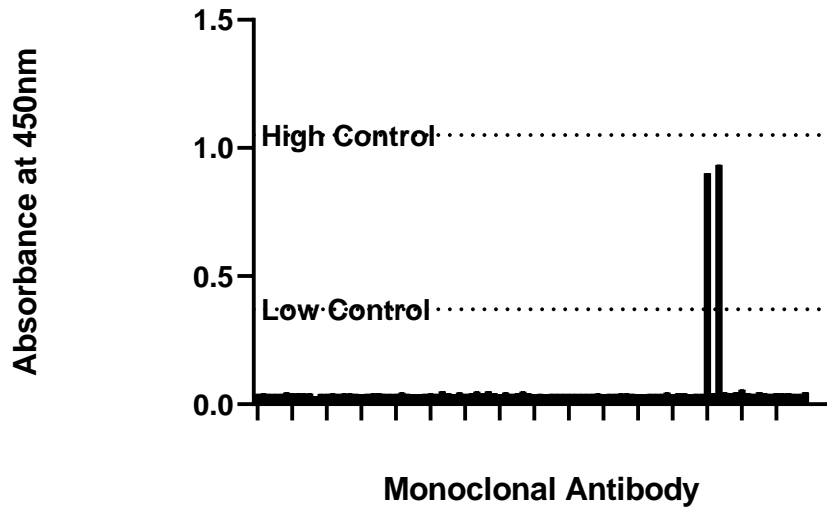

**Fig. S5 – Monoclonal antibody binding to tetanus toxoid**

Antibody binding was measured using the VaccZyme TetanusToxoid ELISA. The monoclonal antibodies were added to the plate at a concentration of 100 ng/ml. Two monoclonal antibodies were shown to bind tetanus toxoid. The positive antibodies are AB-007975 and AB-007990. Both of these were negative for Vi antigen binding in the Vi polysaccharide ELISA.

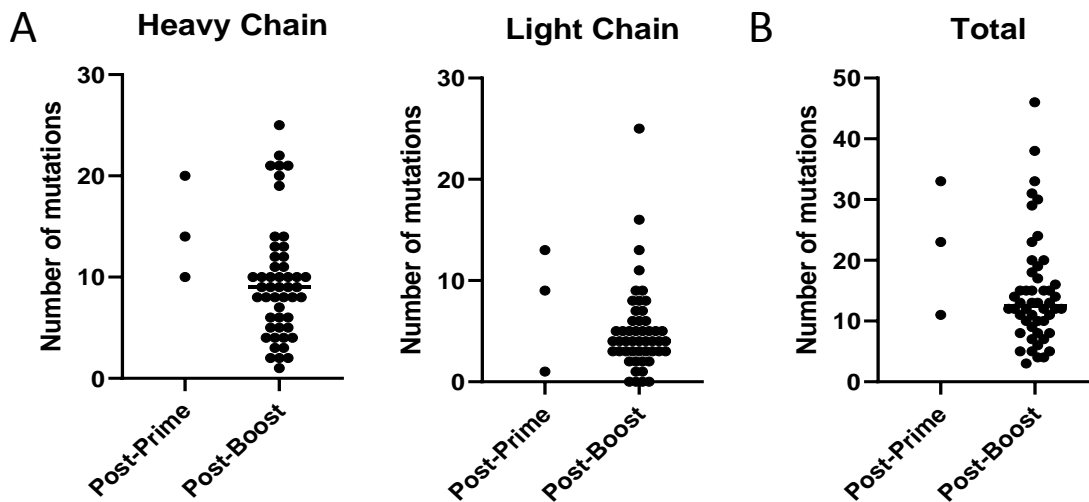

**Fig. S6 – Somatic hypermutations in sequences of Vi-positive monoclonal antibodies**

A) Number of somatic hypermutations in V heavy and V light chain after either primary immunization with Vi-TT (n=3) or after a boost with Vi-PS (n=50). B) Total number of somatic hypermutations in both chains after prime and boost. The number of mutations shown contains both silent and non-silent mutations. The horizontal line indicates the median.

|                                |    | 2 <sup>nd</sup> mAb (AB-00) |       |      |       |       |       |
|--------------------------------|----|-----------------------------|-------|------|-------|-------|-------|
|                                |    | G1                          | G2    | G3   | G4    | G5    |       |
|                                |    | 7977                        | 7972  | 7968 | 7983  | 7991  |       |
| 1 <sup>st</sup> mAb<br>(AB-00) | G1 | 7977                        | Red   | Pink | Pink  | Green | Green |
|                                | G2 | 7972                        | Green | Red  | Green | Green | Green |
|                                | G3 | 7968                        | Pink  | Pink | Red   | Green | Pink  |
|                                | G4 | 7983                        | Pink  | Pink | Pink  | Red   | Pink  |
|                                | G5 | 7991                        | Pink  | Pink | Pink  | Green | Red   |

**Fig. S7 – Antibodies across different families have similar epitope specificities**

Cross-competition between representative mAbs from each convergent family where ViPS antigen is immobilized at low density on biosensor, following by saturated binding of 1<sup>st</sup> mAb, followed by binding of 2<sup>nd</sup> mAb. Red indicates self-blocking, pink indicates cross-blocking, and green indicates no blocking.

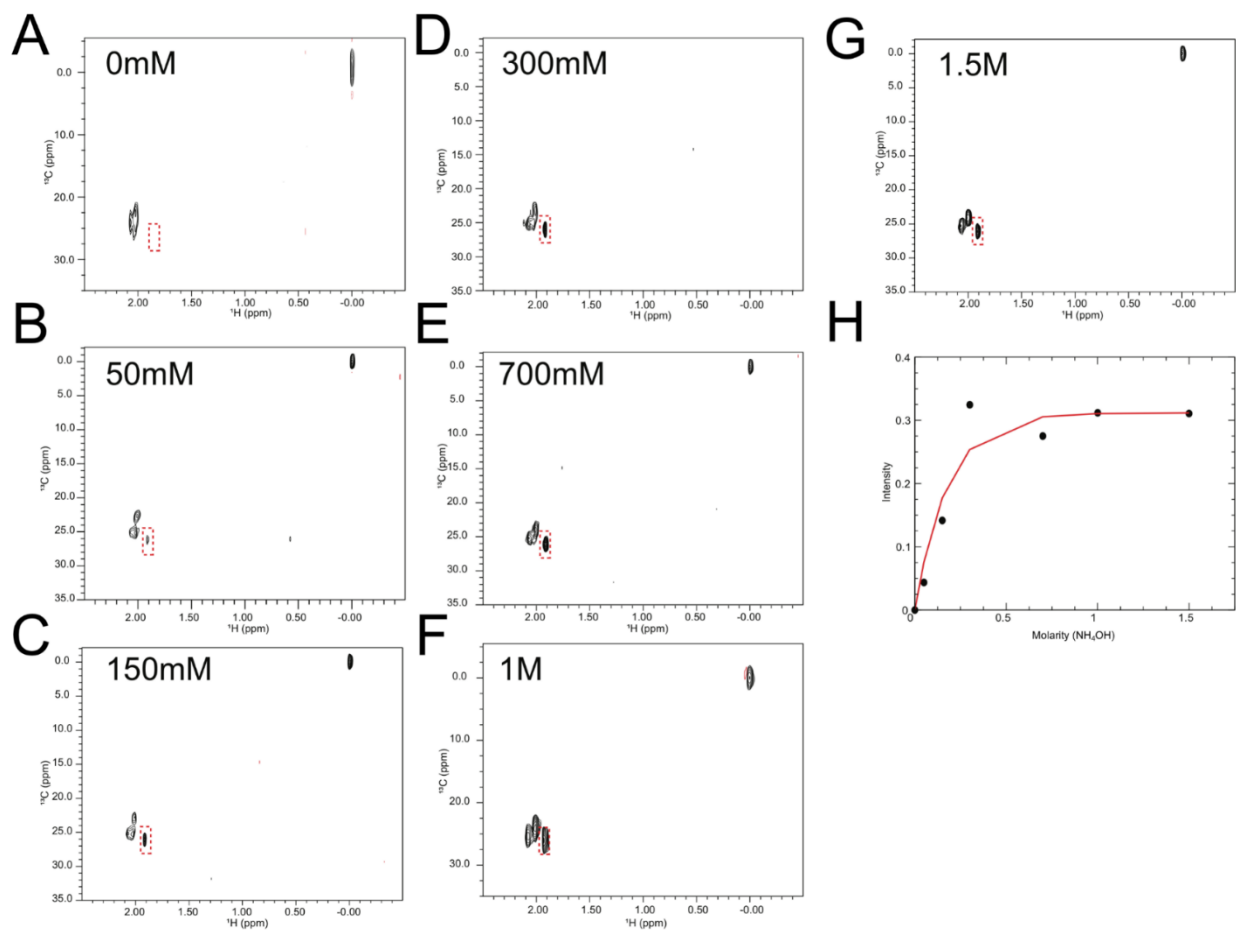

**Fig. S8 – Full  $^1\text{H}$ - $^{13}\text{C}$  HSQC NMR analysis of Vi polysaccharide solutions as function of increasing  $\text{NH}_4\text{OH}$  treatment**

2D NMR spectra of (A) untreated, (B) 0.05 M  $\text{NH}_4\text{OH}$ -treated, (C) 0.15 M  $\text{NH}_4\text{OH}$ -treated, (D) 0.3 M  $\text{NH}_4\text{OH}$ -treated, (E) 0.7 M  $\text{NH}_4\text{OH}$ -treated, (F) 1 M  $\text{NH}_4\text{OH}$ -treated, and (G) 1.5 M  $\text{NH}_4\text{OH}$ -treated *C. freundii* Vi solutions. The x- and y- axis contain the NMR resonances arising from  $^1\text{H}$  and  $^{13}\text{C}$ , respectively, representing  $^1\text{H}$ - $^{13}\text{C}$  direct bonds. Panel H represents the increasing signal (centered around 1.9 ppm ( $^1\text{H}$ ) and 26.5 ppm ( $^{13}\text{C}$ ) – dotted red box in each panel) as function of increasing amounts of  $\text{NH}_4\text{OH}$  treatment.

**A**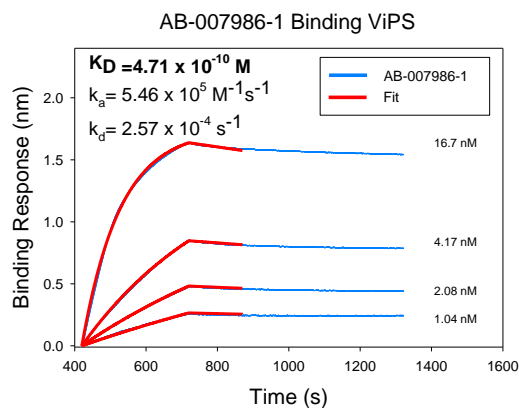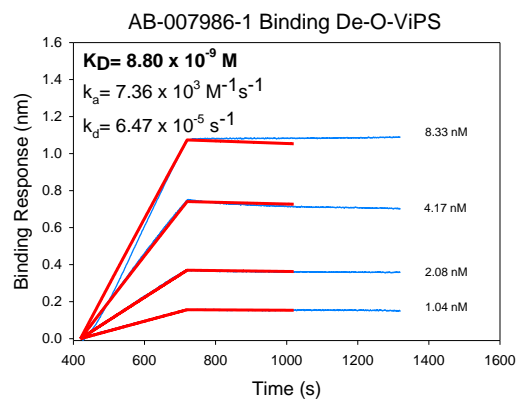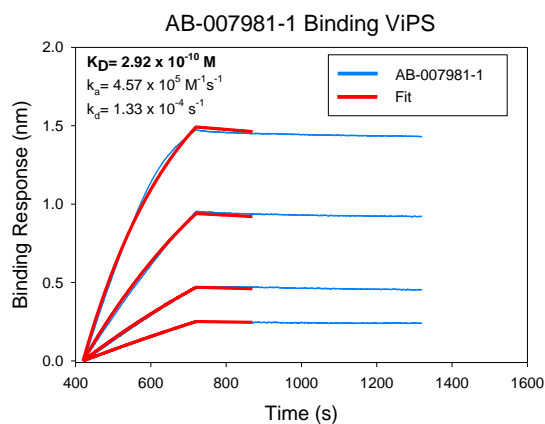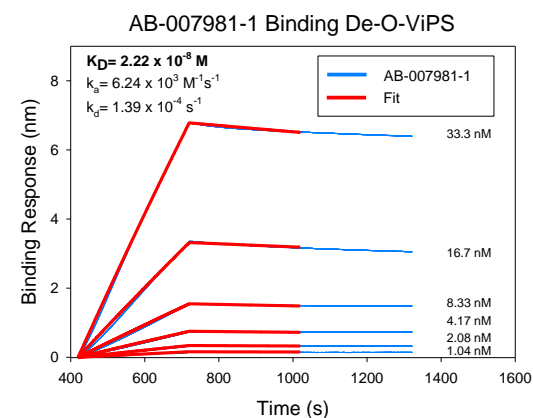**B**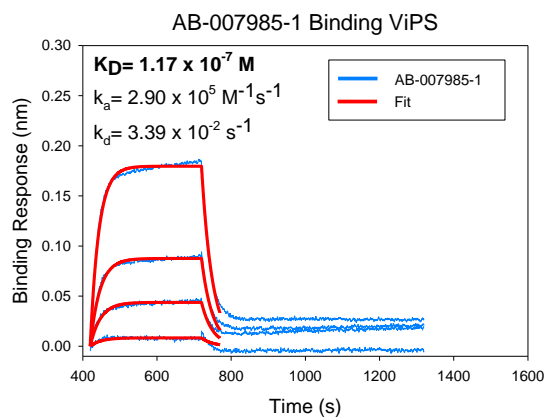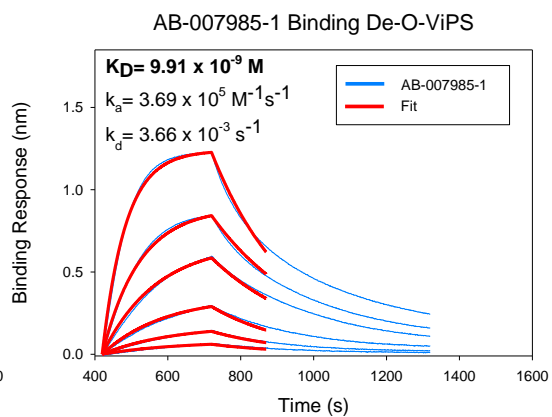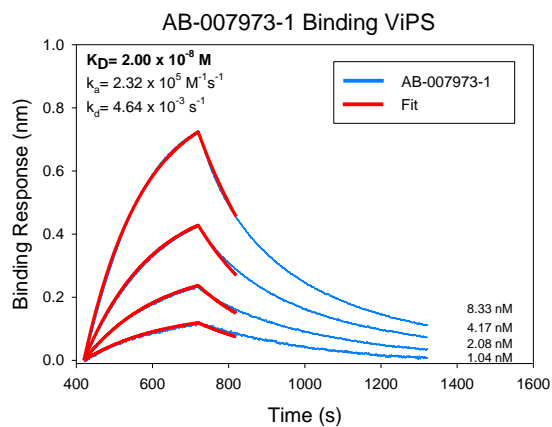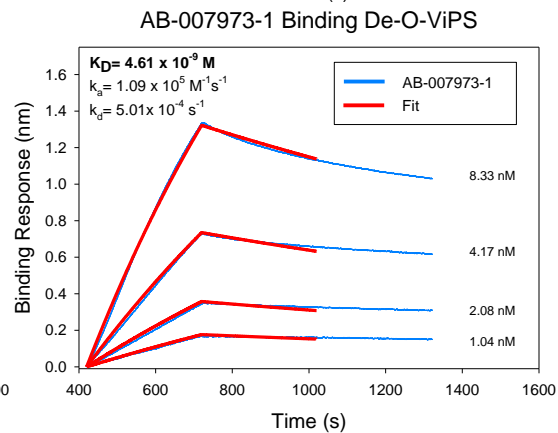



### Fig. S9 – Monoclonal antibodies derived by vaccination target non-O-acetylated Vi

A) Binding sensorgrams of monoclonal antibodies that bind with similar avidity to Vi polysaccharide (left) and de-O-acetylated Vi polysaccharide (right) with corresponding avidity measurements indicated. B) Binding sensorgrams of monoclonal antibodies that bind with weaker avidity to Vi polysaccharide (left) compared to de-O-acetylated Vi polysaccharide (right) with corresponding avidity measurements indicated.

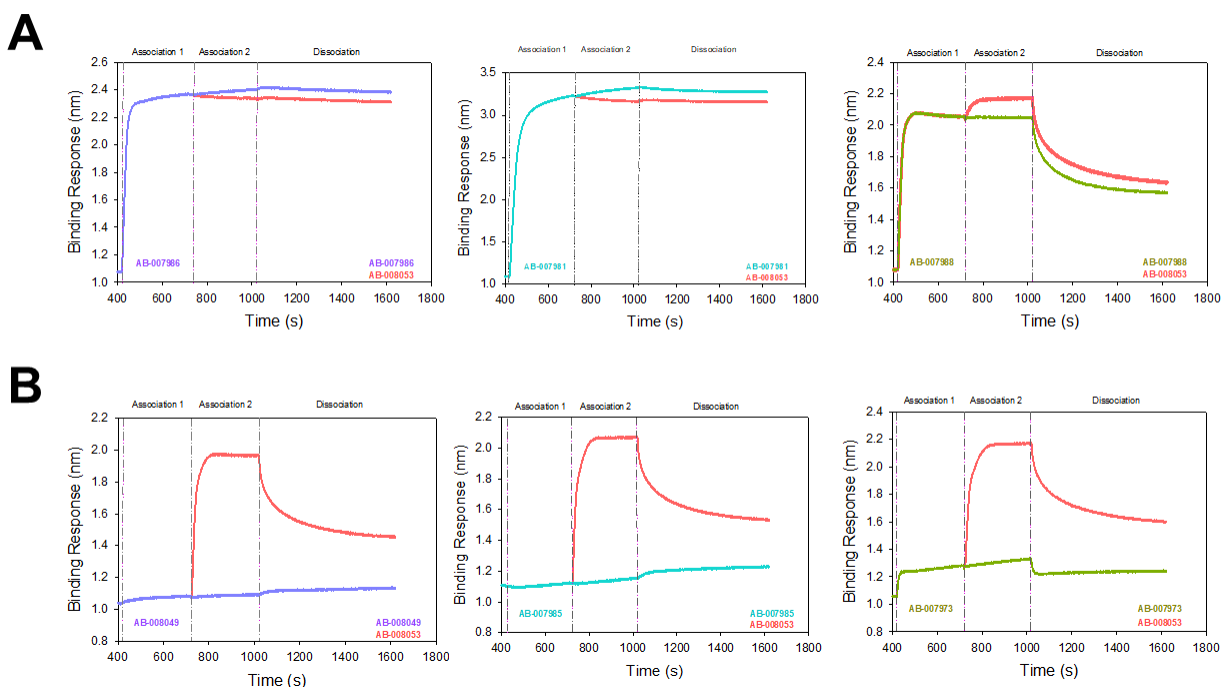

### Fig. S10 – ViPS monoclonal antibodies recognize exposed and occluded epitopes

Competition experiments performed by immobilizing low level ViPS antigen to biosensor, dipping into antibody 1 until binding is completely saturated, and then dipping into antibody 2. A) Competition of SEE mAbs in reverse orientation with SEE mAbs as antibody 1 and AB-008053 as antibody 2. B) Competition of SEO mAbs in reverse orientation with SEO mAbs as antibody 1 and AB-008053 as antibody 2.

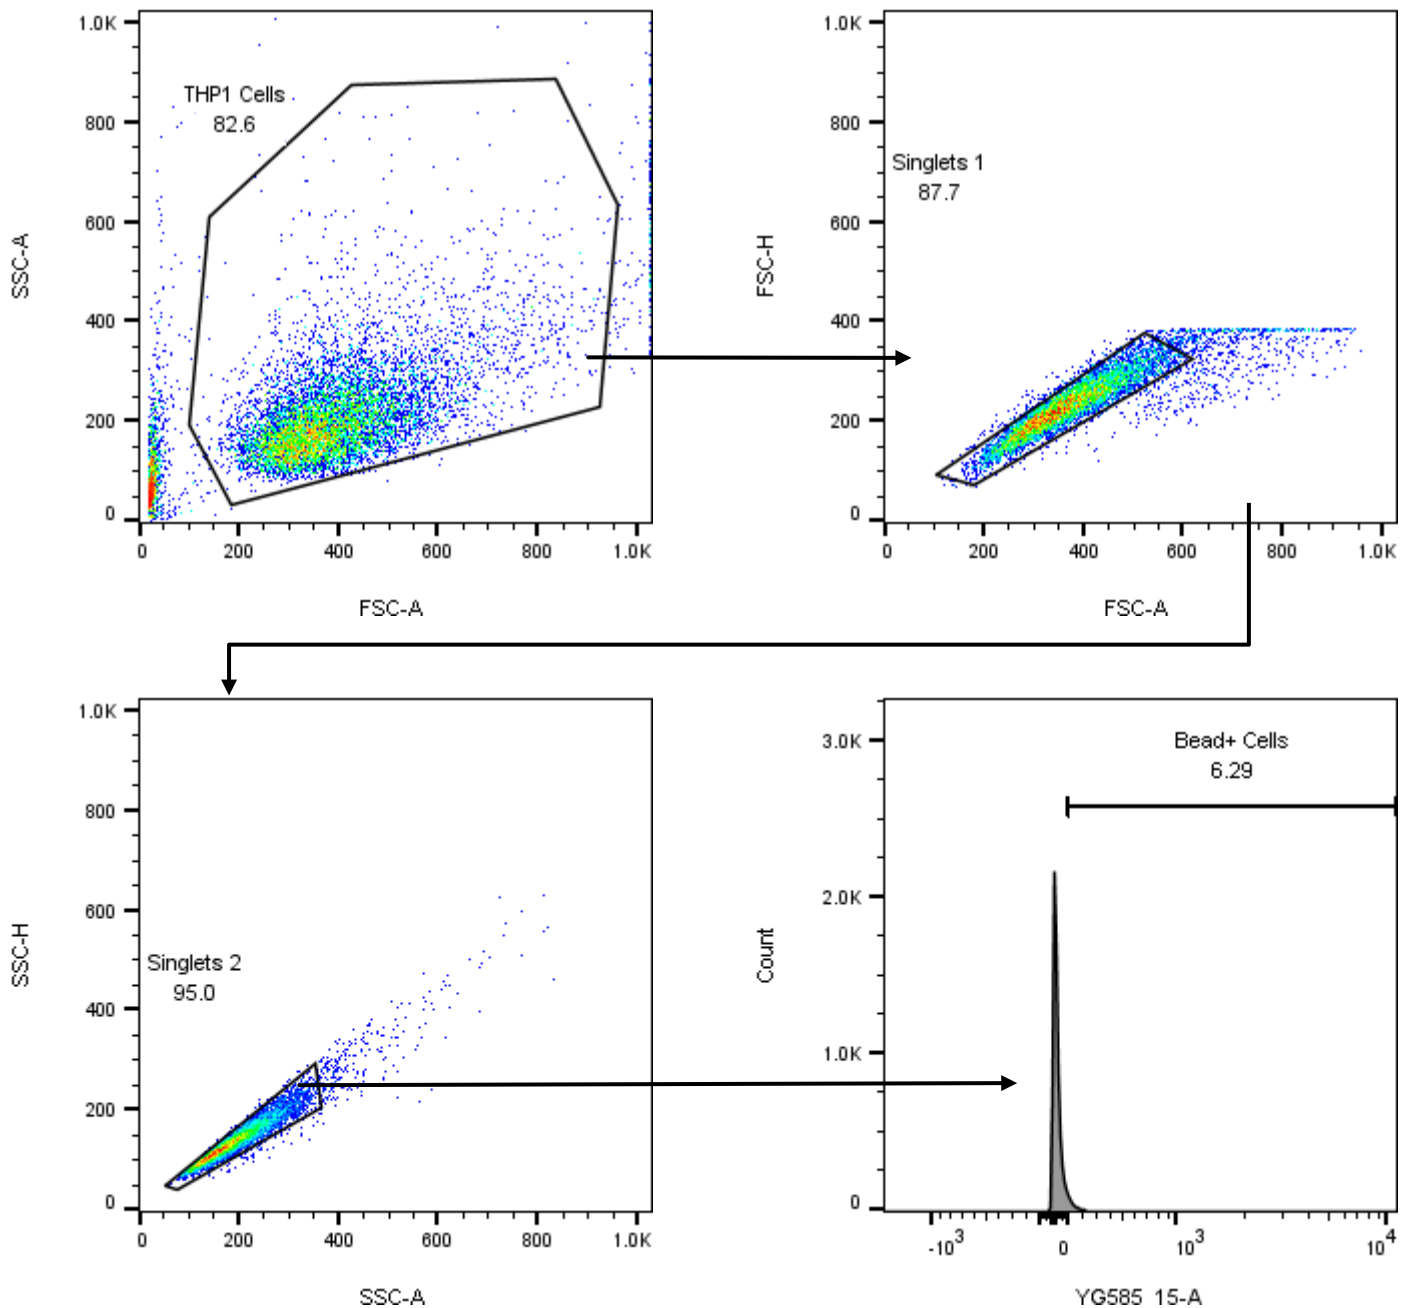

**Fig. S11 – Example of the ADMP gating strategy**

Initially, single cells are gated, followed by a selection of bead-positive cells. The gate for the bead-positive cells is based on a negative control THP-1 sample without any beads. Both the percentage of bead-positive cells and the intensity of the beads are used to calculate the phagocytic score.

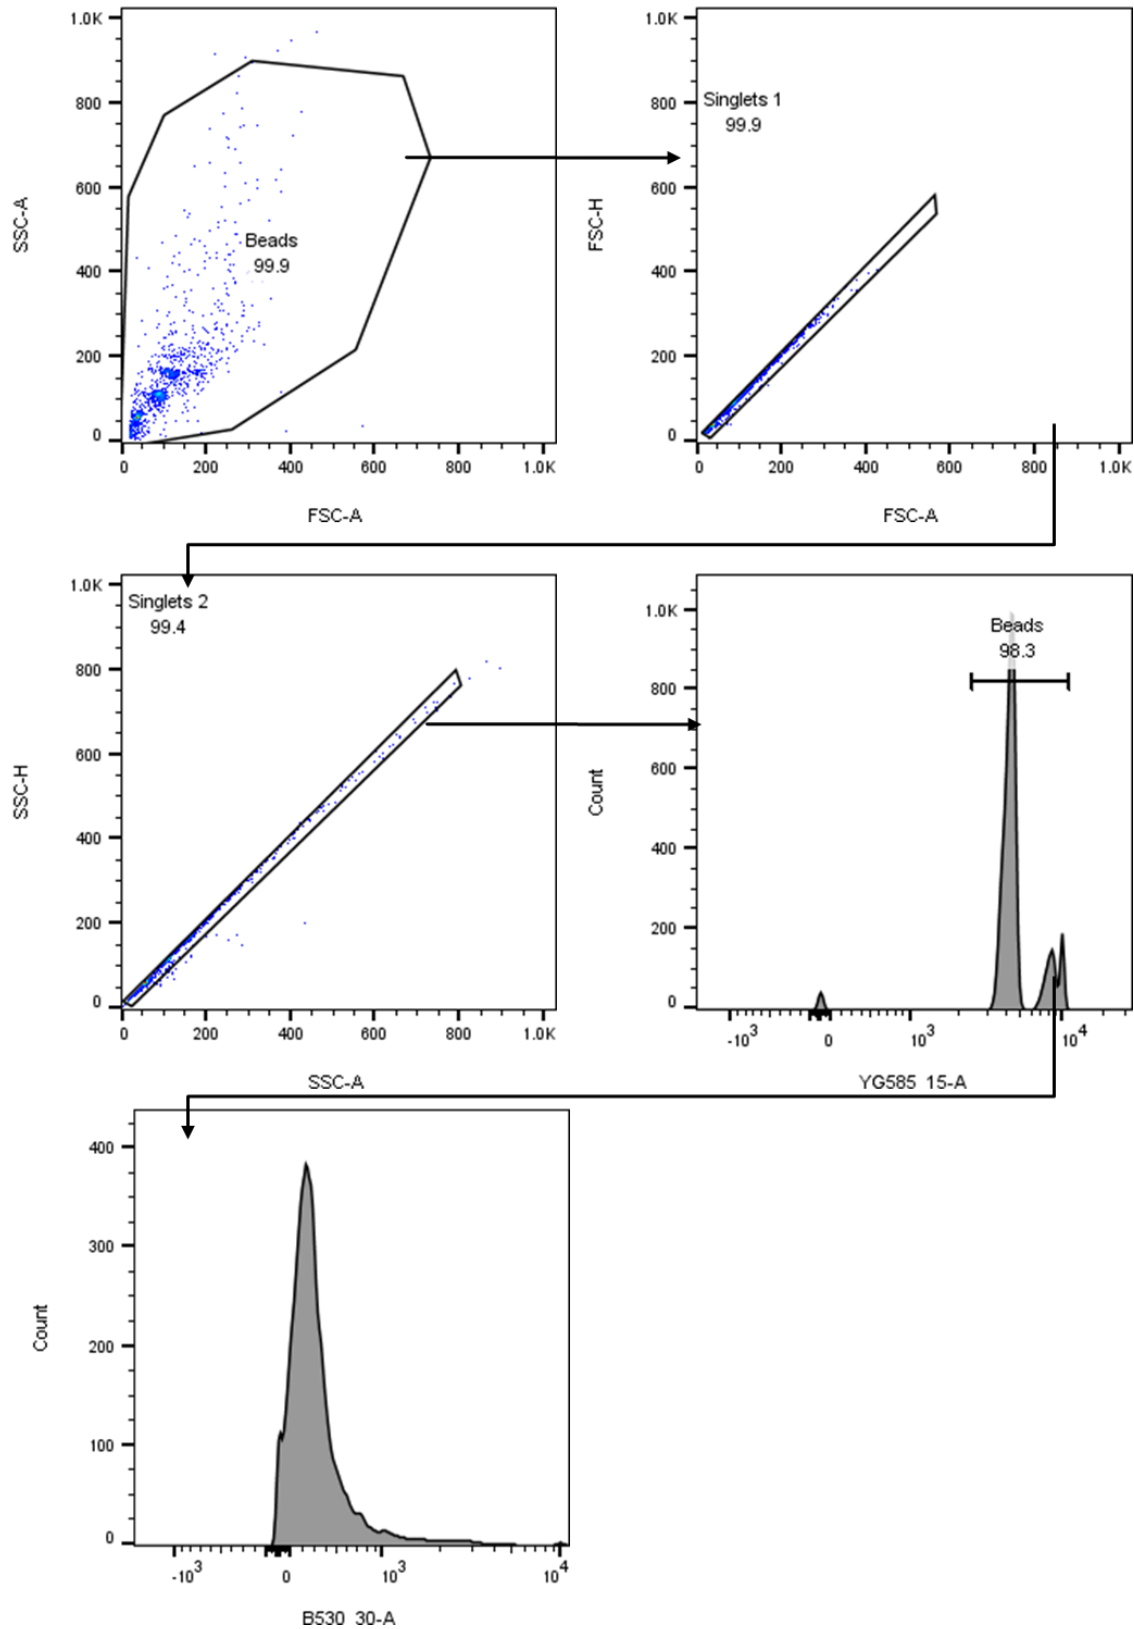

**Fig. S12 – Example of the ADCD gating strategy**

Initially, single beads are gated, after which the anti-guinea pig C3-FITC intensity is measured using geometric mean fluorescent intensity.

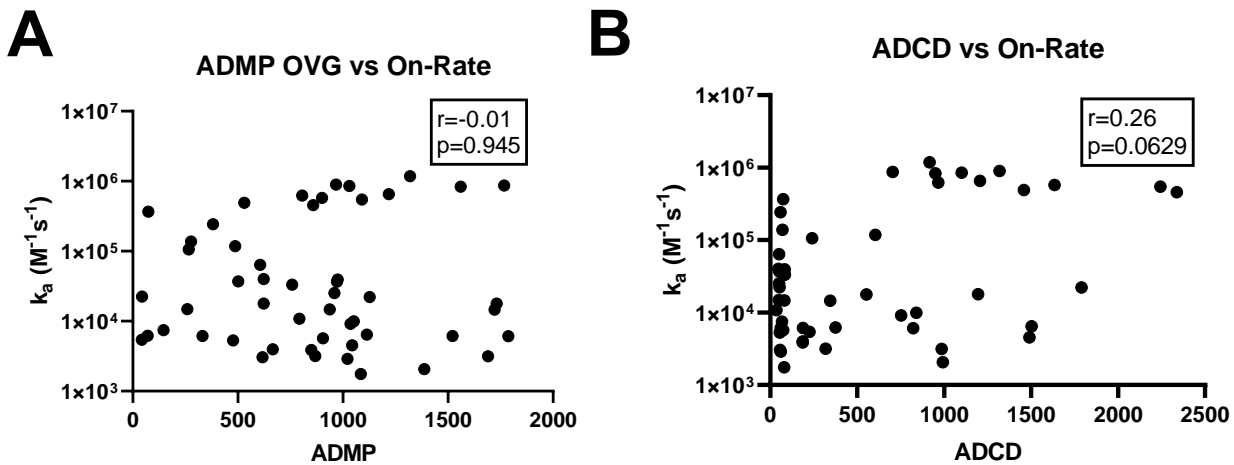

**Fig. S13 – ADMP and ADCD potential are not associated with antibody on-rate**  
Spearman correlations of A) ADMP score and Vi on-rate. B) ADCD score and Vi on-rate.
